# Supplementary material for: Reduced symmetric dimethylation stabilizes vimentin and promotes metastasis in MTAP‐deficient lung cancer
Source: PubMed Central journal article supplement (PMC9346486; doi:10.15252/embr.202154265), 2022-06-29
Supplement: EMBR-23-e54265-s003.pdf [file EMBR-23-e54265-s003.pdf]

## Expanded View Figures

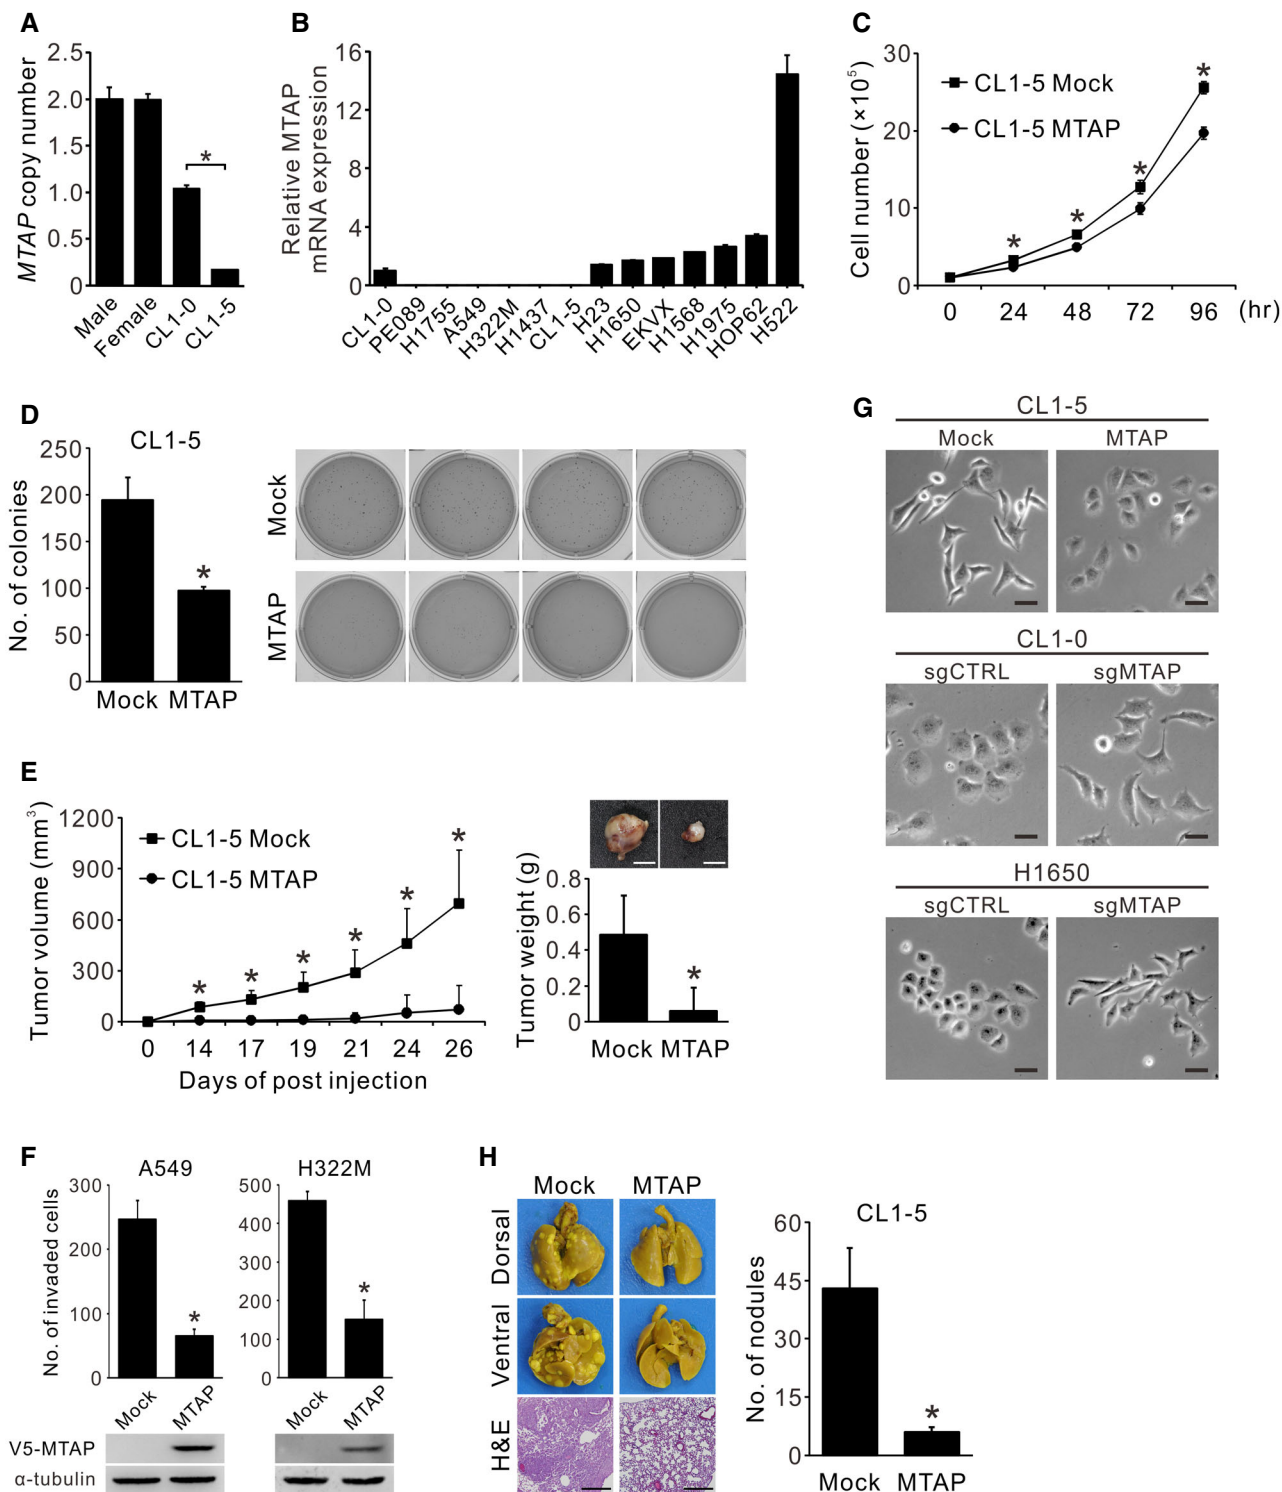

Figure EV1.

**Figure EV1. Expression and effect of MTAP on cell proliferation, colony forming, tumorigenesis, invasion, morphology, and metastasis in lung cancer cells.**

- A Comparison of *MTAP* DNA copy number between PBMCs from healthy donors, CL1-0, and CL1-5 cells detected by real-time genomic PCR (mean  $\pm$  SD, Student *t* test,  $n = 3$ , biological replicates,  $*P < 0.05$ ). Ribonuclease P (*RNaseP*) served as the internal control.
- B Relative mRNA expression of *MTAP* was detected in 14 lung cancer cell lines assayed by RT-qPCR (mean  $\pm$  SD,  $n = 3$ , biological replicates). TATA-binding protein (*TBP*) served as the internal control.
- C Effect of *MTAP* on cell proliferation was determined by cell collection and counting at indicated time points (mean  $\pm$  SD, Student *t* test,  $n = 3$ , technical replicates,  $*P < 0.05$ ). Data shown are representative of three independent experiments.
- D Effect of *MTAP* on anchorage-independent colony formation. Left: quantification of colonies stained by crystal violet and counted under phase microscopy (mean  $\pm$  SD, Student *t* test,  $n = 4$ , biological replicates,  $*P < 0.05$ ). Right: images of anchorage-independent colony formation assays of CL1-5 Mock control and *MTAP*-overexpressing cells.
- E CL1-5 Mock and *MTAP*-overexpressing transfectants were subcutaneously injected into the NOD/SCID mice to determine the tumorigenesis ability. Left: the tumor volumes measured at indicated days (mean  $\pm$  SD, Student *t* test,  $n = 8$ , biological replicates,  $*P < 0.05$ ). Right: representative images of tumors and the tumor weights measured at 27 days postinjection (mean  $\pm$  SD, Student *t* test,  $n = 8$ , biological replicates,  $*P < 0.05$ ). Scale bar, 5 mm.
- F Cell invasion abilities of *MTAP*-overexpressing A549 and H322M were determined by Matrigel invasion assays (mean  $\pm$  SD, Student *t* test,  $n = 3$ , biological replicates,  $*P < 0.05$ ). Bottom: the protein expression levels of V5-*MTAP* were detected by Western blots.
- G Effect of *MTAP* expression on cell morphology. Cells were examined by a phase contrast microscope. Scale bar, 50  $\mu$ m. Data shown are representative of three independent experiments.
- H Micrometastatic analysis of *MTAP*-overexpressing cells. NOD/SCID mice were intravenously injected with CL1-5 Mock control and *MTAP*-overexpressing cells, and sacrificed at 10 weeks post injection. Left: the appearances and the representative hematoxylin and eosin (H&E) staining of the lung sections from mice injected with CL1-5 Mock and *MTAP* transfectants. Scale bar, 50  $\mu$ m. Right: the gross pulmonary metastasis nodules were quantified under dissecting microscope (Mock,  $n = 11$ ; *MTAP*,  $n = 9$ ; biological replicates, mean  $\pm$  SE, Student *t* test,  $*P < 0.05$ ).

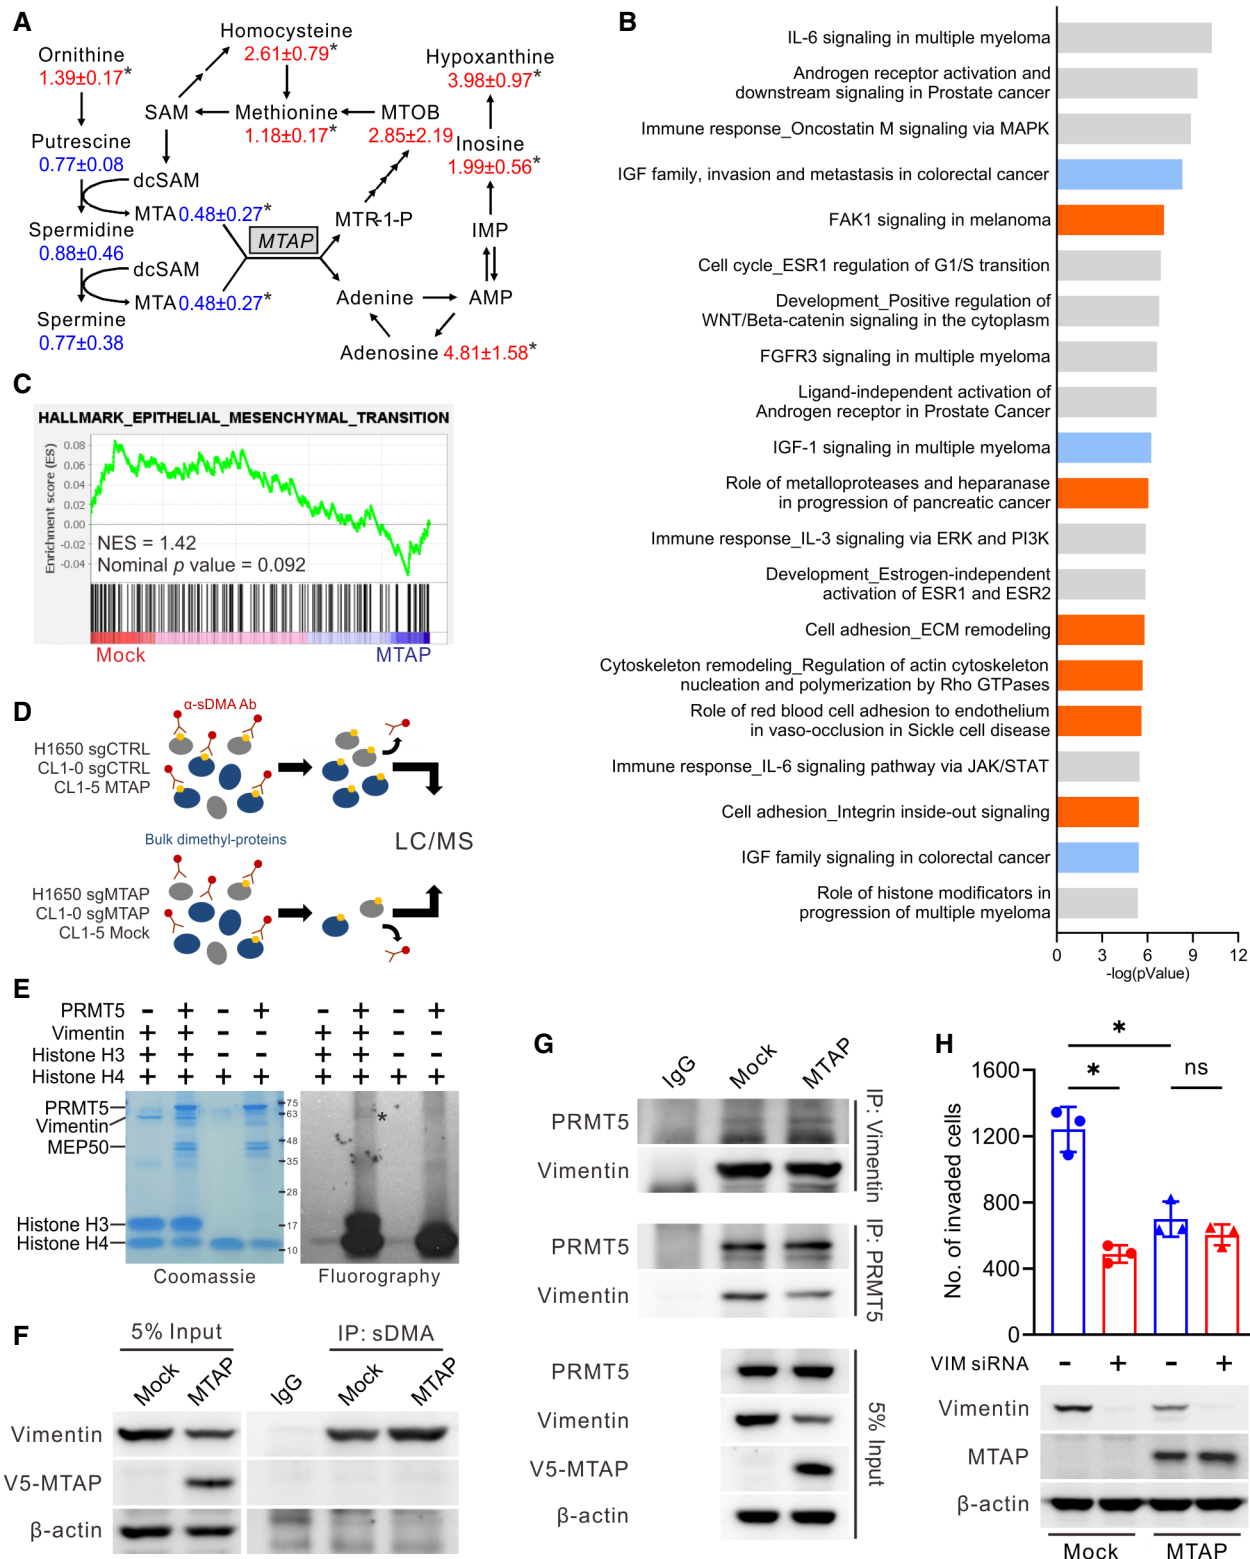

Figure EV2.

**Figure EV2. MTAP-mediated metabolism, signaling pathways, and methylproteome.**

- A MTAP-mediated metabolic alterations in polyamine, methionine, and adenine salvage pathways. The numbers are the average fold change intensities and associated errors for metabolites of CL1-5 MTAP/CL1-5 Mock (Student *t* test, *n* = 3, biological replicates, \**P* < 0.05).
- B Top 20 ranking MTAP-altered pathways and cellular processes identified by the MetaCore analytical suite (version 20.4 build 70,300). Blue bars: IGF-related pathways; Orange bars: cell adhesion/cytoskeleton remodeling and invasion-related pathways.
- C Gene Set Enrichment Analysis (GSEA) of expression microarray data from CL1-5 Mock and MTAP-overexpressing cells were performed using the gene set of HALLMARK\_EPITHELIAL\_MESENCHYMAL\_TRANSITION.
- D Schematic diagram of the identification of differentially symmetrically dimethylated proteins.
- E *In vitro* methylation of vimentin by PRMT5. Tritiated proteins were separated by SDS-PAGE, stained with Coomassie blue (left), dried and analyzed by fluorography (right). Histone H3 and H4 proteins were used as positive controls. \*: tritiated vimentin.
- F Immunoprecipitation analysis for vimentin dimethylation in CL1-5 Mock and MTAP-overexpressing cells. Data shown are representative of three independent experiments.
- G Immunoprecipitation analysis of the association between endogenous vimentin and endogenous PRMT5 in CL1-5 Mock and MTAP-overexpressing cells. Data shown are representative of three independent experiments.
- H CL1-5 MTAP-overexpressing and Mock cells were transfected with vimentin siRNAs for 72 h and analyzed by Boyden chamber invasion assays (mean ± SD, Student *t* test, *n* = 3, biological replicates, \**P* < 0.05). The silence efficiency of vimentin was examined by Western blot.

Source data are available online for this figure.

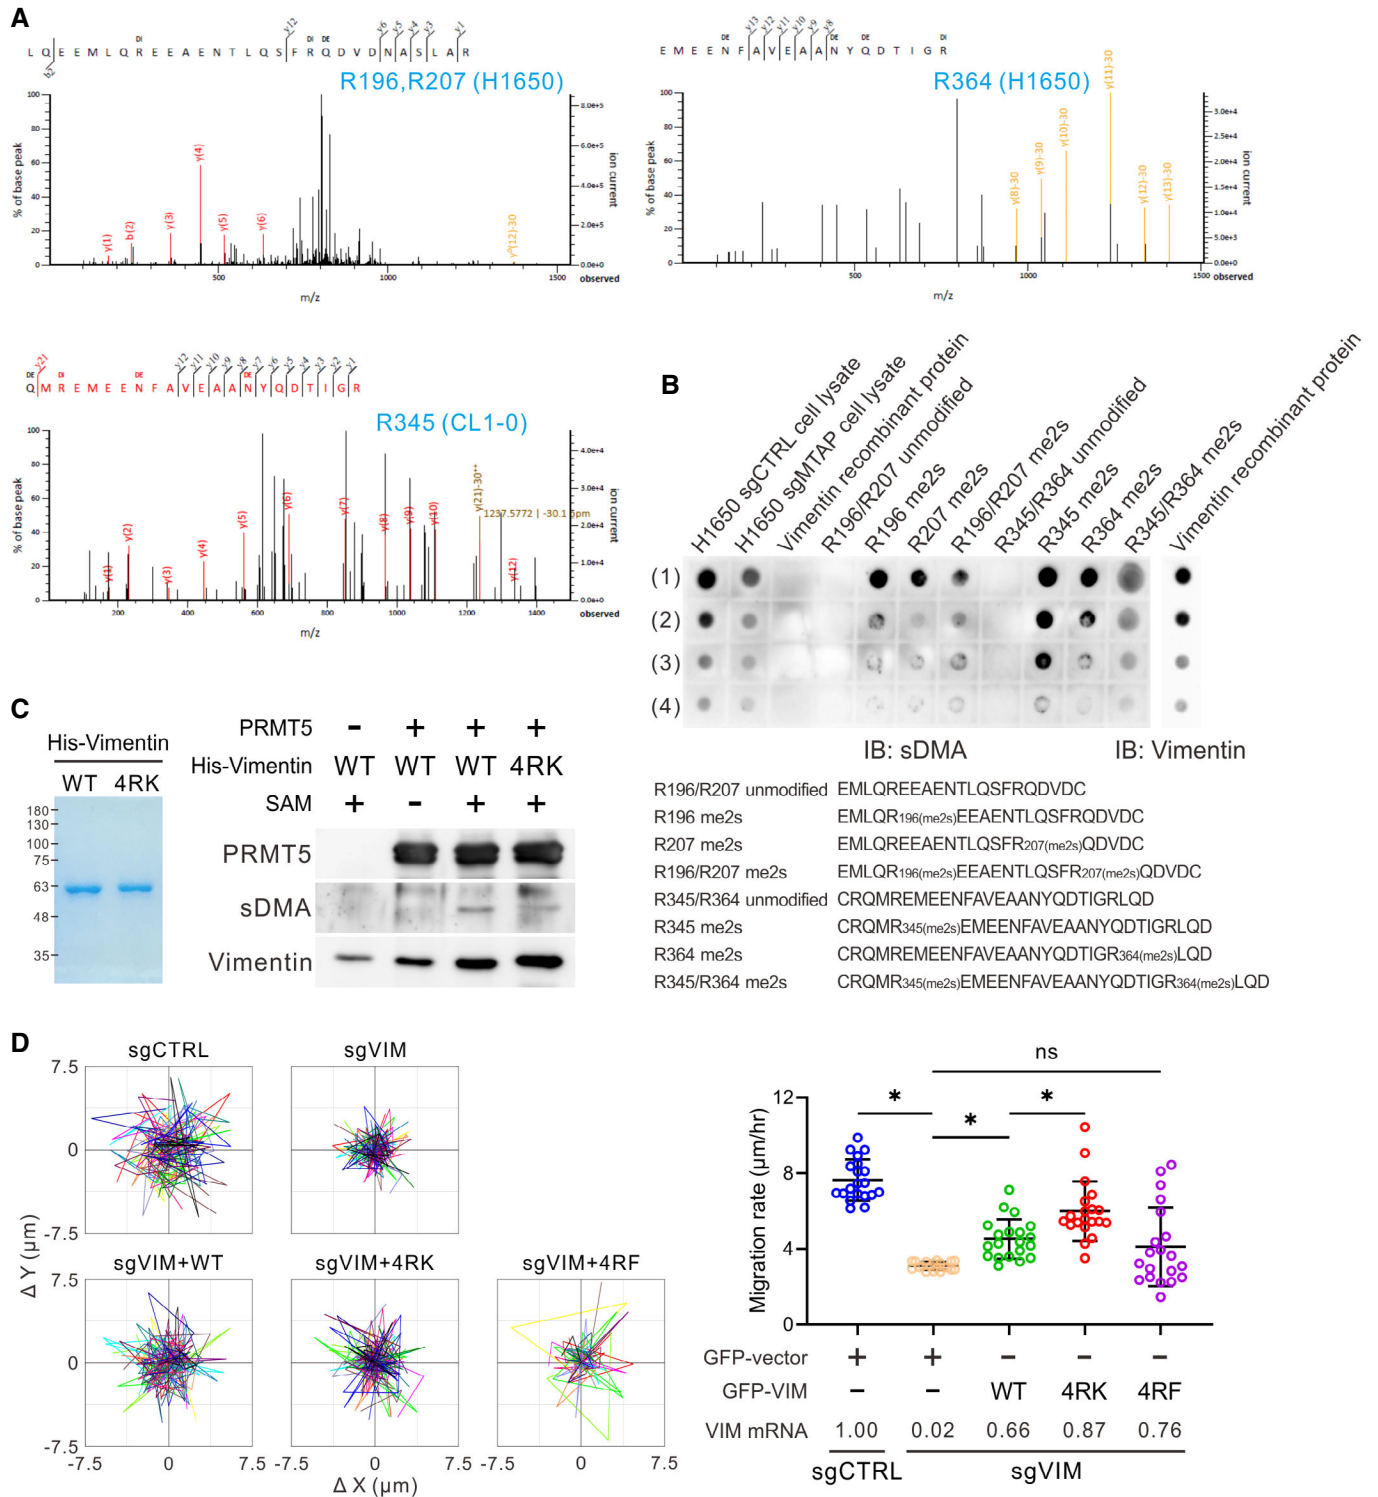

Figure EV3.

**Figure EV3. Effect of PRMT5-mediated sDMA on vimentin-governed cell motility.**

- A MS/MS spectra evidence of sDMA at R196, R207, and R364 from H1650 vimentin and R345 from CL1-0 vimentin.
- B Dot blot analysis showing specificity of sDMA antibody. H1650 cell lysates were used as positive controls. The sequences of non-methylated (unmodified) and dimethylated (me2s) vimentin peptides were shown in the bottom. H1650 cell lysates: (1) 6.5  $\mu$ g, (2) 3.2  $\mu$ g, (3) 1.6  $\mu$ g, (4) 0.8  $\mu$ g. Vimentin recombinant protein: (1) 0.5  $\mu$ g, (2) 0.25  $\mu$ g, (3) 0.125  $\mu$ g, (4) 0.0625  $\mu$ g. Vimentin peptides: (1) 5  $\mu$ g, (2) 2.5  $\mu$ g, (3) 1.25  $\mu$ g, (4) 0.625  $\mu$ g.
- C *In vitro* methyltransferase assays of vimentin wild-type and 4RK mutant by PRMT5 analyzed by Western blots with anti-sDMA antibody (right). Left: purified His-vimentin proteins were stored in methylation reaction buffer, fractionated by SDS-PAGE, and visualized by Coomassie blue stain. Data shown are representative of two independent experiments.
- D Single-cell tracking migration assays. CL1-5 control and vimentin-knockout cells were transfected with GFP vector or GFP-vimentin for 48 h. Cells expressing GFP fluorescence were tracked by the time-lapse video microscopy system. Representative trajectories and quantification of averaged velocity of cells (mean  $\pm$  SD, Student *t* test, *n* = 20, technical replicates, \**P* < 0.05). 4RK indicates R196/207/345/364K; 4RF indicates R196/207/345/364F. Data shown are representative of three independent experiments.

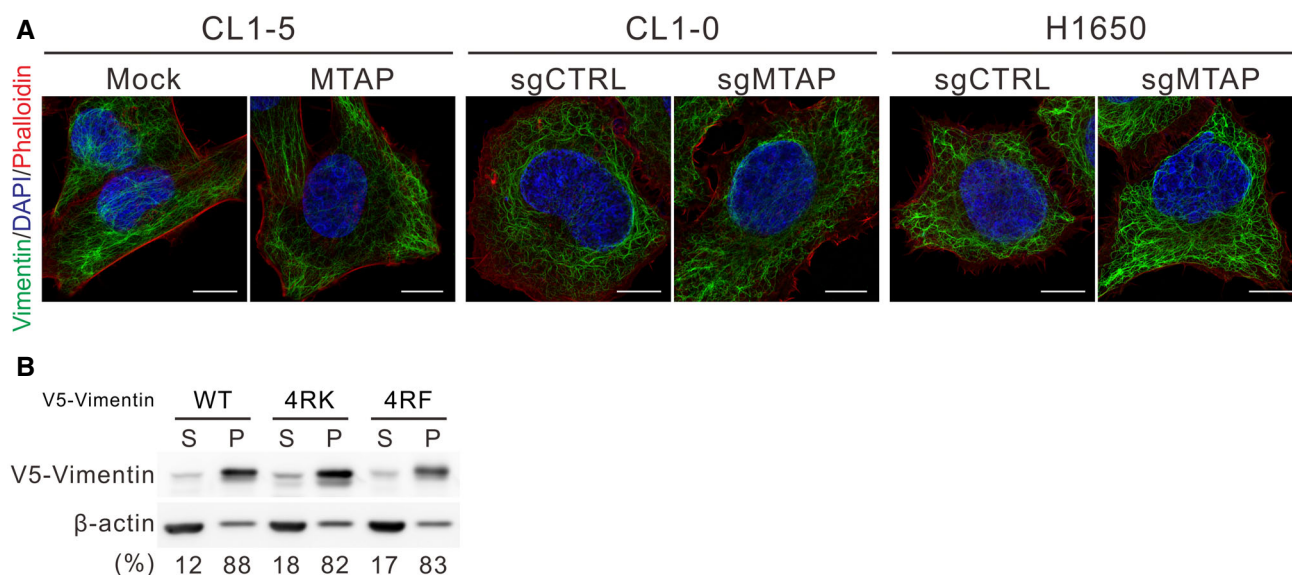**Figure EV4. Effect of MTAP-dependent sDMA on vimentin polymerization.**

- A Immunofluorescence staining of vimentin in indicated cell lines. F-actin was stained with phalloidin, and nucleus was stained with DAPI. Scale bar, 10  $\mu$ m. Data shown are representative of three independent experiments.
- B Fractionation of soluble and insoluble V5-vimentin. CL1-0 cells were transiently expressed with V5-vimentin wild-type, 4RK and 4RF mutants for 48 h. The cells were fractionated to supernatants (S) and pellets (P). After pellets were resolved by sonication, equal portions of lysates were subjected to immunoblotting. The ratio of V5-vimentin in the supernatant and pellet fractions was measured by ImageJ software. Data shown are representative of three independent experiments.

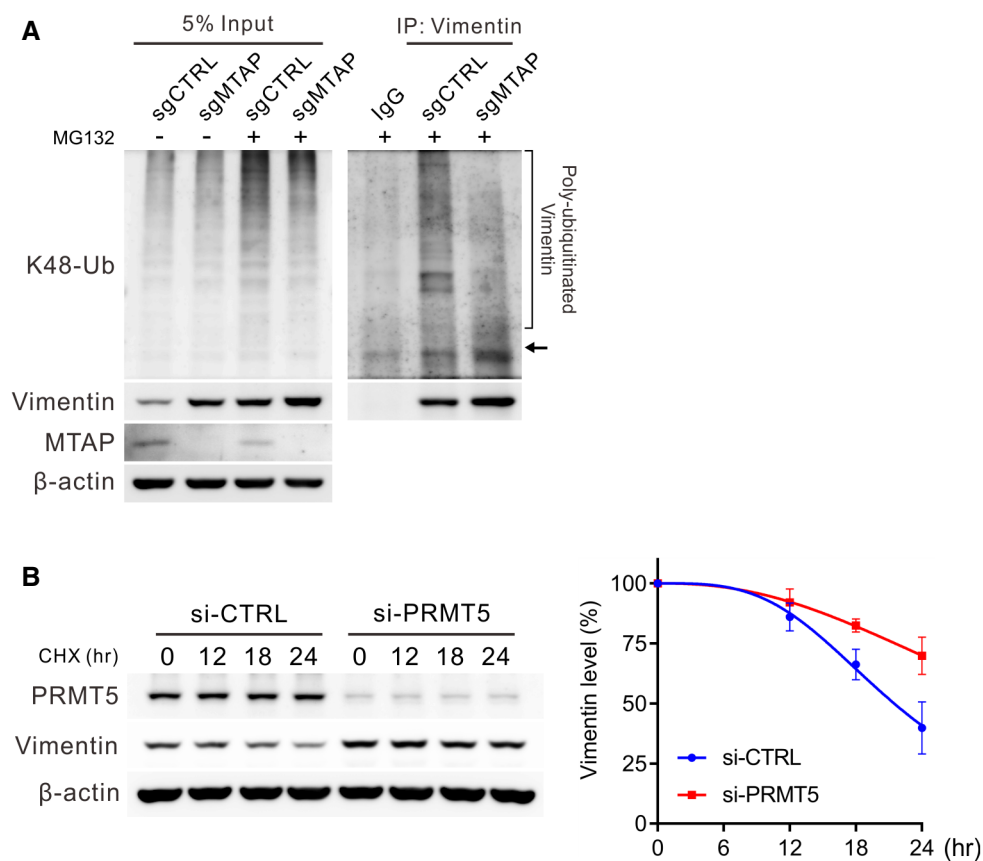

**Figure EV5. Effect of sDMA on vimentin ubiquitination and protein stability.**

A Immunoprecipitation analysis for K48-linked polyubiquitination of vimentin in CL1-0 control and MTAP-knockout cells pretreated with 10  $\mu$ M of MG132 for 3 h. Arrow marks the site of vimentin. Data shown are representative of three independent experiments.

B Western blot analysis of endogenous vimentin levels in H1650 control and PRMT5-silencing cells treated with 50  $\mu$ g/ml cycloheximide (CHX). Right: the intensity of vimentin signals was quantified by ImageJ software, normalized to the internal control  $\beta$ -actin, then normalized to zero time point, and plotted against time points (mean  $\pm$  SE,  $n = 4$ , biological replicates).
